# Supplementary material
Source: Springer Nature journal article supplement (https://www.springermedizin.de/resource/supplementary/12911_2011_447_MOESM4_ESM.pdf/9525766)
Supplement: MOESM4 [file 9525766]

## What You Need Now

### Eat Healthy

Choose the right foods for your body.

### You Have High Cholesterol

Get the follow-up care you need for your cholesterol.

## Your Key Dates

### Preventive Service

Stool test for cancer  
Sigmoidoscopy  
Colonoscopy  
PSA test  
Aneurysm ultrasound  
Pneumonia shot  
Flu shot  
Tetanus shot

### Date Measured

No date  
No date  
No date  
No date  
No date  
No date  
10/5/2010  
11/29/2010

## Cancer Screening

## Heart Care

| Screening      | Status | Next Steps                                       |
|----------------|--------|--------------------------------------------------|
| Cholesterol    |        | Get your cholesterol checked now                 |
| Aspirin        |        | Decide if you should take aspirin                |
| Blood pressure |        | Get your blood pressure checked before 3/15/2012 |

## Health Behaviors

## Vaccines

## Other Services

## Your Key Values

| Preventive Measure        | Date Measured | Your Value | Your Goal | How You're Doing |
|---------------------------|---------------|------------|-----------|------------------|
| Body mass index           | 3/15/2010     | 27         | < 25      |                  |
| Blood pressure            | 3/15/2010     | 118/78     | < 140/90  |                  |
| LDL (bad) cholesterol     | 3/15/2010     | 112        | < 160     |                  |
| HDL (good) cholesterol    | 3/15/2010     | 51         | >= 40     |                  |
| Blood sugar               | 3/15/2010     | 91         | < 126     |                  |
| Hemoglobin A1c            | No date       | No value   | <= 7.0    |                  |
| Prostate-Specific Antigen | No date       | No value   | < 4.0     |                  |

### Update Your Health Information

View and update your health information to make sure *MyPreventiveCare's* recommendations are right for you. *MyPreventiveCare* is missing some of your information:

None

### Follow Your Conditions

Your *MyPreventiveCare* record shows you have:

High cholesterol

### Follow Your Abnormal Results

Your *MyPreventiveCare* record shows you have had abnormal results on these tests:

None
